# Supplementary material for: Use of Chronic Oral Anticoagulation and Associated Outcomes Among Patients Undergoing Percutaneous Coronary Intervention
Source: PubMed Central journal article supplement — J Am Heart Assoc. 2016 Oct 17;5(10):e004310. doi: 10.1161/JAHA.116.004310 (PMC5121523; doi:10.1161/jaha.116.004310), 2016-10-17
Supplement: JAH3-5-e004310-s001.pdf [file JAH3-5-e004310-s001.pdf]

# **SUPPLEMENTAL MATERIAL**

**Table S1. Patient Characteristics of PCIs by NOAC versus VKA Use**

|                                                                      | <b>NOAC Use<br/>(N=66)</b> | <b>VKA Use<br/>(N=771)</b> | <b>P Value</b> |
|----------------------------------------------------------------------|----------------------------|----------------------------|----------------|
| <b>Age (years), mean ± SD</b>                                        | 70.5 ± 11.6                | 71.8 ± 11.2                | 0.36           |
| <b>Male (%)</b>                                                      | 52 (78.8)                  | 569 (73.8)                 | 0.37           |
| <b>White (%)</b>                                                     | 63 (95.5)                  | 715 (92.7)                 | 0.41           |
| <b>BMI (kg/m<sup>2</sup>), mean ± SD</b>                             | 29.6 ± 7.44                | 29.1 ± 6.19                | 0.56           |
| <b>Current/recent smoking (within 1 year) (%)</b>                    | 2 (3.03)                   | 73 (9.47)                  | .078           |
| <b>Hypertension (%)</b>                                              | 59 (89.4)                  | 691 (89.6)                 | 0.95           |
| <b>Dyslipidemia (%)</b>                                              | 61 (92.4)                  | 732 (94.9)                 | 0.38           |
| <b>Family history of CAD (%)</b>                                     | 11 (16.7)                  | 121 (15.7)                 | 0.84           |
| <b>Renal failure (currently on dialysis or creatinine &gt;2) (%)</b> | 0 (0)                      | 76 (9.86)                  | <0.01          |
| <b>Cerebrovascular disease (%)</b>                                   | 11 (16.7)                  | 234 (30.4)                 | 0.019          |
| <b>Peripheral artery disease (%)</b>                                 | 9 (13.6)                   | 186 (24.1)                 | 0.053          |
| <b>Chronic lung disease (%)</b>                                      | 6 (9.09)                   | 166 (21.5)                 | 0.016          |
| <b>Diabetes mellitus (%)</b>                                         | 24 (36.4)                  | 318 (41.3)                 | 0.44           |
| <b>Prior heart failure (%)</b>                                       | 23 (34.9)                  | 321 (41.6)                 | 0.28           |
| <b>Prior myocardial infarction (%)</b>                               | 34 (51.5)                  | 373 (48.4)                 | 0.62           |
| <b>Prior valve surgery (%)</b>                                       | 3 (4.55)                   | 112 (14.5)                 | 0.023          |
| <b>Prior PCI (%)</b>                                                 | 28 (42.4)                  | 305 (40.0)                 | 0.65           |
| <b>Prior CABG (%)</b>                                                | 19 (28.8)                  | 259 (33.6)                 | 0.43           |

|                                                    |           |            |       |
|----------------------------------------------------|-----------|------------|-------|
| <b>Anemia at presentation (%)</b>                  | 29 (43.9) | 392 (50.8) | 0.28  |
| <b>Indication for oral anticoagulant (%)</b>       |           |            |       |
| Atrial fibrillation/flutter                        | 55 (83.3) | 598 (77.6) | 0.28  |
| Venous thromboembolism                             | 7 (10.6)  | 130 (16.9) | 0.19  |
| Left ventricular dysfunction, aneurysm or thrombus | 2 (3.03)  | 74 (9.60)  | 0.075 |
| Valvular heart disease                             | 2 (3.03)  | 37 (4.80)  | 0.51  |
| Cardio-embolic stroke                              | 2 (3.03)  | 12 (1.56)  | 0.37  |
| Hypercoaguable syndrome                            | 7 (10.6)  | 42 (5.45)  | 0.086 |
| Other                                              | 2 (3.03)  | 35 (4.54)  | 0.57  |
| <b>Type of oral anticoagulant (%)</b>              |           |            |       |
| Warfarin                                           | ---       | 771 (100)  | ---   |
| Dabigatran                                         | 39 (60.0) | ---        | ---   |
| Rivaroxaban                                        | 20 (30.8) | ---        | ---   |
| Apixaban                                           | 3 (4.62)  | ---        | ---   |
| Other                                              | 3 (4.62)  | ---        | ---   |
| <b>P2Y12 inhibitor at admission (%)</b>            | 10 (15.2) | 168 (21.8) | 0.21  |
| <b>Type of P2Y12 inhibitor</b>                     |           |            | 0.96  |
| Clopidogrel                                        | 10 (100)  | 163 (97.0) | 0.96  |
| Ticagrelor                                         | 0 (0)     | 1 (0.60)   |       |
| Prasugrel                                          | 0 (0)     | 3 (1.79)   |       |
| Other                                              | 0 (0)     | 1 (0.60)   |       |

|                                                                                                                                                                                                                                                      |              |                |       |
|------------------------------------------------------------------------------------------------------------------------------------------------------------------------------------------------------------------------------------------------------|--------------|----------------|-------|
| <b>Aspirin at admission (%)</b>                                                                                                                                                                                                                      | 47 (71.2)    | 545 (70.7)     | 0.93  |
| <b>Bridging therapy among elective PCIs (%)</b>                                                                                                                                                                                                      | 3/24 (12.5)  | 65/283 (23.0)  | 0.24  |
| <b>Oral anticoagulant among survivors to discharge (%)</b>                                                                                                                                                                                           | 61/66 (92.4) | 672/750 (89.6) | 0.47  |
| <b>P2Y12 inhibitor among survivors to discharge (%)</b>                                                                                                                                                                                              | 63/66 (95.5) | 727/750 (96.9) | 0.51  |
| <b>Type of P2Y12 inhibitor</b>                                                                                                                                                                                                                       |              |                |       |
| Clopidogrel                                                                                                                                                                                                                                          | 59/63 (93.6) | 714/727 (98.2) | 0.029 |
| Ticagrelor                                                                                                                                                                                                                                           | 3/63 (4.76)  | 7/727 (0.96)   |       |
| Prasugrel                                                                                                                                                                                                                                            | 1/63 (1.59)  | 6/727 (0.83)   |       |
| <b>Aspirin among survivors at discharge (%)</b>                                                                                                                                                                                                      | 66/66 (100)  | 734/750 (97.9) | 0.23  |
| <b>Triple therapy among survivors at discharge (%)</b>                                                                                                                                                                                               | 58/66 (87.9) | 635/750 (84.7) | 0.48  |
| Abbreviations: BMI, body mass index; CABG, coronary artery bypass graft; CAD, coronary artery disease; NOAC, non-vitamin K antagonist oral anticoagulant; PCI, percutaneous coronary intervention; SD, standard deviation; VKA, vitamin K antagonist |              |                |       |

**Table S2. Presentation and Procedural Characteristics of PCIs by NOAC versus VKA Use**

|                                                      | <b>NOAC Use<br/>(N=66)</b> | <b>VKA Use<br/>(N=771)</b> | <b>P Value</b> |
|------------------------------------------------------|----------------------------|----------------------------|----------------|
| <b>Presentation type (%)</b>                         |                            |                            | 0.30           |
| STEMI                                                | 6 (9.09)                   | 40 (5.19)                  | ---            |
| NSTEMI                                               | 12 (18.2)                  | 159 (20.6)                 | ---            |
| Unstable angina                                      | 17 (25.8)                  | 219 (28.4)                 | ---            |
| Stable angina                                        | 17 (25.8)                  | 140 (18.2)                 | ---            |
| Other                                                | 14 (21.2)                  | 213 (27.6)                 | ---            |
| <b>Cardiogenic shock w/in 24 hours (%)</b>           | 2 (3.03)                   | 17 (2.20)                  | 0.67           |
| <b>Cardiac arrest w/in 24 hours (%)</b>              | 2 (3.03)                   | 16 (2.08)                  | 0.61           |
| <b>Cardiomyopathy or LV systolic dysfunction (%)</b> | 17 (25.8)                  | 324 (42.0)                 | <0.01          |
| <b>Arterial access (%)</b>                           |                            |                            |                |
| Femoral                                              | 39 (59.1)                  | 505 (65.5)                 | 0.29           |
| Radial                                               | 27 (40.9)                  | 244 (31.7)                 | 0.12           |
| <b>Procedure anticoagulants (%)</b>                  |                            |                            |                |
| Unfractionated heparin                               | 55 (83.3)                  | 631 (81.8)                 | 0.76           |
| Low molecular weight heparin                         | 1 (1.52)                   | 13 (1.69)                  | 0.92           |
| Glycoprotein IIb/IIIa inhibitor                      | 0 (0)                      | 26 (3.37)                  | 0.13           |
| Bivalirudin                                          | 22 (33.3)                  | 270 (35.0)                 | 0.78           |
| <b>Highest risk lesion class (%)</b>                 |                            |                            |                |
| SCAI class II/III vs I                               | 20 (30.3)                  | 217 (28.2)                 | 0.71           |
| SCAI class IV vs I                                   | 3 (4.55)                   | 50 (6.49)                  | 0.53           |

|                                                                                                                                                                                                                                                                                                                                                                                                                                                          |               |               |       |
|----------------------------------------------------------------------------------------------------------------------------------------------------------------------------------------------------------------------------------------------------------------------------------------------------------------------------------------------------------------------------------------------------------------------------------------------------------|---------------|---------------|-------|
| <b>Highest risk lesion (%)</b>                                                                                                                                                                                                                                                                                                                                                                                                                           |               |               |       |
| pLAD (vs other)                                                                                                                                                                                                                                                                                                                                                                                                                                          | 9 (13.6)      | 109 (14.1)    | 0.91  |
| Left main (vs other)                                                                                                                                                                                                                                                                                                                                                                                                                                     | 5 (7.58)      | 59 (7.65)     | 0.98  |
| <b>DES placed (%)</b>                                                                                                                                                                                                                                                                                                                                                                                                                                    | 31 (47.0)     | 310 (40.2)    | 0.28  |
| <b>BMS placed (%)</b>                                                                                                                                                                                                                                                                                                                                                                                                                                    | 32 (48.5)     | 395 (51.2)    | 0.67  |
| <b>IABP (%)</b>                                                                                                                                                                                                                                                                                                                                                                                                                                          | 4 (6.06)      | 22 (2.85)     | 0.15  |
| <b>Other mechanical support (%)</b>                                                                                                                                                                                                                                                                                                                                                                                                                      | 2 (3.03)      | 15 (1.95)     | 0.55  |
| <b>Number of diseased vessels</b>                                                                                                                                                                                                                                                                                                                                                                                                                        |               |               |       |
| 1                                                                                                                                                                                                                                                                                                                                                                                                                                                        | 21 (31.8)     | 299 (38.8)    | 0.26  |
| 2+                                                                                                                                                                                                                                                                                                                                                                                                                                                       | 43 (65.2)     | 455 (59.0)    |       |
| <b>Number of lesions, mean ± SD</b>                                                                                                                                                                                                                                                                                                                                                                                                                      | 1.50 ± 0.71   | 1.39 ± 0.69   | 0.21  |
| <b>Total number of stents during lab visit, mean ± SD</b>                                                                                                                                                                                                                                                                                                                                                                                                | 1.55 ± 0.76   | 1.57 ± 0.88   | 0.88  |
| <b>Thrombus present (%)</b>                                                                                                                                                                                                                                                                                                                                                                                                                              | 10 (15.2)     | 115 (14.9)    | 0.96  |
| <b>In-stent restenosis (%)</b>                                                                                                                                                                                                                                                                                                                                                                                                                           | 6 (9.09)      | 109 (14.1)    | 0.25  |
| <b>Pre-procedure hemoglobin (g/dL), mean ± SD</b>                                                                                                                                                                                                                                                                                                                                                                                                        | 12.7 ± 2.11   | 12.3 ± 2.22   | 0.17  |
| <b>Post-procedure hemoglobin (g/dL), mean ± SD</b>                                                                                                                                                                                                                                                                                                                                                                                                       | 11.8 ± 2.20   | 11.3 ± 2.03   | 0.10  |
| <b>Pre-procedure creatinine (mg/dl), mean ± SD</b>                                                                                                                                                                                                                                                                                                                                                                                                       | 1.05 ± 0.30   | 1.44 ± 1.28   | 0.012 |
| <b>Post-procedure creatinine (mg/dl), mean ± SD</b>                                                                                                                                                                                                                                                                                                                                                                                                      | 1.08 ± 0.42   | 1.55 ± 1.49   | 0.018 |
| <b>Predicted risk of post-PCI bleeding, mean ± SD</b>                                                                                                                                                                                                                                                                                                                                                                                                    | 0.023 ± 0.016 | 0.029 ± 0.026 | 0.071 |
| <b>Predicted risk of in-hospital mortality, mean ± SD</b>                                                                                                                                                                                                                                                                                                                                                                                                | 0.012 ± 0.034 | 0.024 ± 0.078 | 0.22  |
| Abbreviations: BMS, bare metal stent; DES, drug eluting stent; GFR, glomerular filtration rate; IABP, intra-aortic balloon pump; LV, left ventricular; NSTEMI, non-ST-elevation myocardial infarction; NOAC, non-vitamin K antagonist oral anticoagulant; pLAD, proximal left anterior descending; SCAI, society for cardiac angiography and interventions; SD, standard deviation; STEMI, ST elevation myocardial infarction; VKA, vitamin K antagonist |               |               |       |

**Table S3. Unadjusted Rates of Outcomes by NOAC versus VKA Use**

|                                                        | <b>NOAC Use<br/>(N=66)</b> | <b>VKA Use<br/>(N=771)</b> | <b>Absolute<br/>Risk<br/>Difference<br/>with NOAC<br/>Use</b> | <b>Number<br/>Needed to<br/>Harm</b> | <b>P value</b> |
|--------------------------------------------------------|----------------------------|----------------------------|---------------------------------------------------------------|--------------------------------------|----------------|
| <b>Primary</b>                                         |                            |                            |                                                               |                                      |                |
| In-hospital major bleeding (%)                         | 7 (10.6)                   | 81 (10.5)                  | +0.10                                                         | ---                                  | 0.98           |
| In-hospital mortality (%)                              | 0 (0)                      | 21 (2.72)                  | -2.72                                                         | ---                                  | 0.17           |
| <b>Secondary</b>                                       |                            |                            |                                                               |                                      |                |
| Access-site bleeding (%)                               | 2 (3.03)                   | 17 (2.20)                  | +0.83                                                         | ---                                  | 0.67           |
| Nonaccess-site bleeding (%)                            | 5 (7.58)                   | 64 (8.30)                  | -0.72                                                         | ---                                  | 0.84           |
| RBC transfusion (%)                                    | 6 (9.09)                   | 54 (7.00)                  | +2.09                                                         | ---                                  | 0.53           |
| In-hospital stent thrombosis (%)                       | 0 (0)                      | 3 (0.39)                   | -0.39                                                         | ---                                  | 0.61           |
| Post-PCI MI (%)                                        | 2 (3.03)                   | 19 (2.46)                  | +0.57                                                         | ---                                  | 0.78           |
| CVA/Stroke (%)                                         | 0 (0)                      | 4 (0.52)                   | -0.52                                                         | ---                                  | 0.56           |
| Post-PCI length of stay (days), mean $\pm$ SD          | 3.09 $\pm$ 4.80            | 4.02 $\pm$ 5.55            | ---                                                           | ---                                  | 0.19           |
| 30-day readmissions within index healthcare system (%) | 4 (6.06)                   | 82 (10.6)                  | -4.57                                                         | ---                                  | 0.24           |
| 90-day readmissions within index healthcare system (%) | 9 (13.6)                   | 176 (22.8)                 | -9.19                                                         | ---                                  | 0.08           |

Abbreviations: CVA, cerebrovascular accident; MI, myocardial infarction; NOAC, non-vitamin K antagonist oral anticoagulant; PCI, percutaneous coronary intervention; RBC, red blood cell; SD, standard deviation; VKA, vitamin K antagonist

**Table S4. Unadjusted and Adjusted Risks of Outcomes with Vitamin K Antagonist Oral Anticoagulant Use**

|                                                          | Unadjusted |                         |         | Adjusted by Propensity Score |                         |         |
|----------------------------------------------------------|------------|-------------------------|---------|------------------------------|-------------------------|---------|
|                                                          | Risk Ratio | 95% Confidence Interval | P value | Risk Ratio                   | 95% Confidence Interval | P value |
| <b>Long-term mortality</b>                               | 9.09       | 1.27, 65.1              | 0.028   | 6.76                         | 0.93, 49.2              | 0.059   |
| <b>In-hospital major bleeding</b>                        | 0.99       | 0.44, 2.24              | 0.98    | 0.72                         | 0.30, 1.74              | 0.46    |
| <b>Access-site bleeding</b>                              | 0.72       | 0.16, 3.19              | 0.67    | 0.40                         | 0.08, 1.99              | 0.26    |
| <b>Nonaccess-site bleeding</b>                           | 1.10       | 0.43, 2.85              | 0.84    | 1.00                         | 0.38, 2.71              | 0.99    |
| <b>90-day readmission within index healthcare system</b> | 1.87       | 0.91, 3.86              | 0.089   | 1.63                         | 0.77, 3.46              | 0.20    |



**Figure S1. Temporal Trends in Antithrombotic Regimens at Admission and Discharge among Patients on Chronic Oral Anticoagulant Therapy**

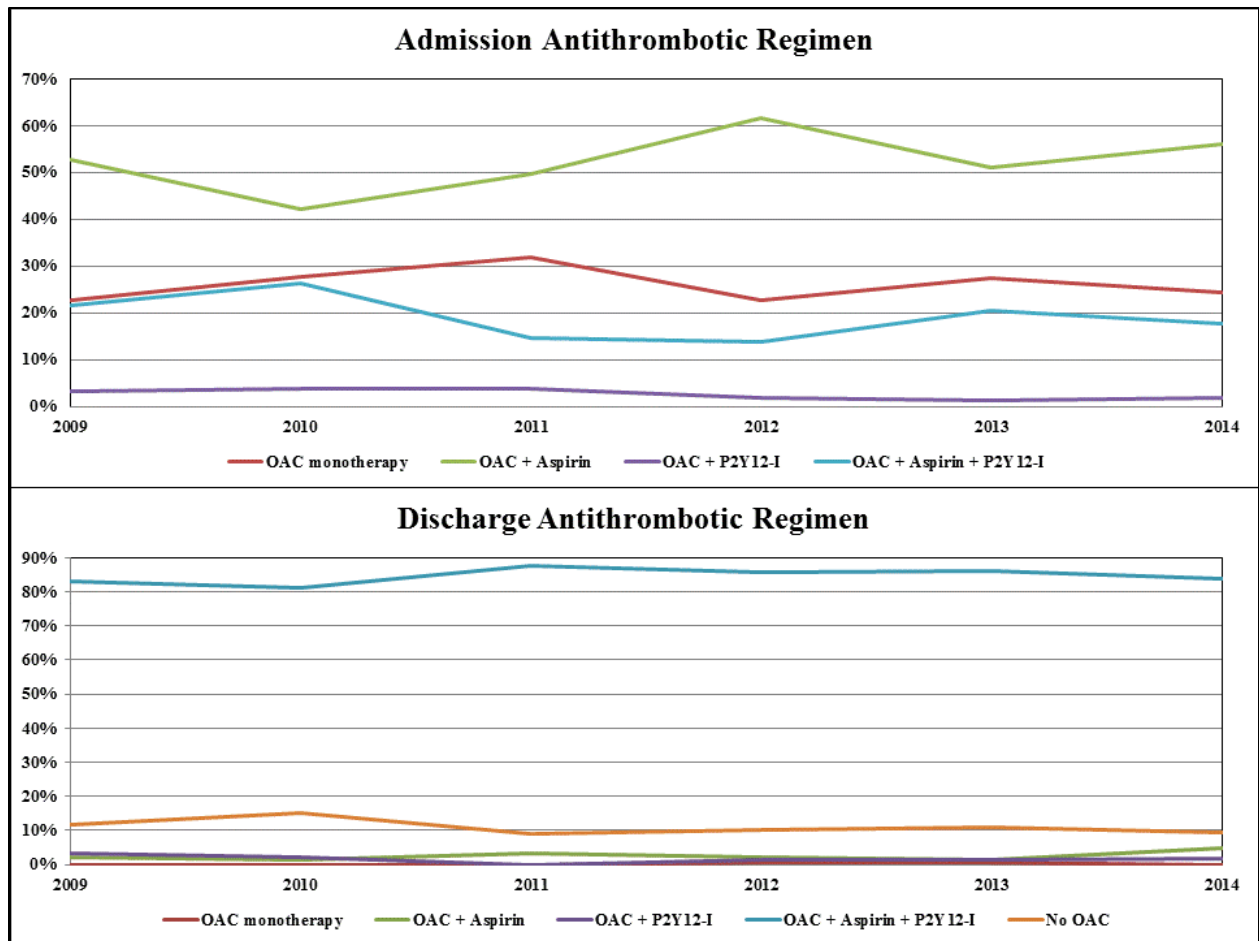

**Figure Legend:**

**Figure S1.** Temporal changes in use of antithrombotic agents at admission and discharge among patients on chronic oral anticoagulant therapy undergoing percutaneous coronary intervention during the study period. OAC, oral anticoagulant therapy; P2Y12-I, P2Y12 receptor inhibitor.
